# Supplementary material for: Genome-Wide Identification of AP2/ERF Transcription Factor Family and Functional Analysis of DcAP2/ERF#96 Associated with Abiotic Stress in Dendrobium catenatum
Source: MDPI journal article supplement (doi:10.3390/ijms232113603), 2022-11-06
Supplement: s1 [file s1]

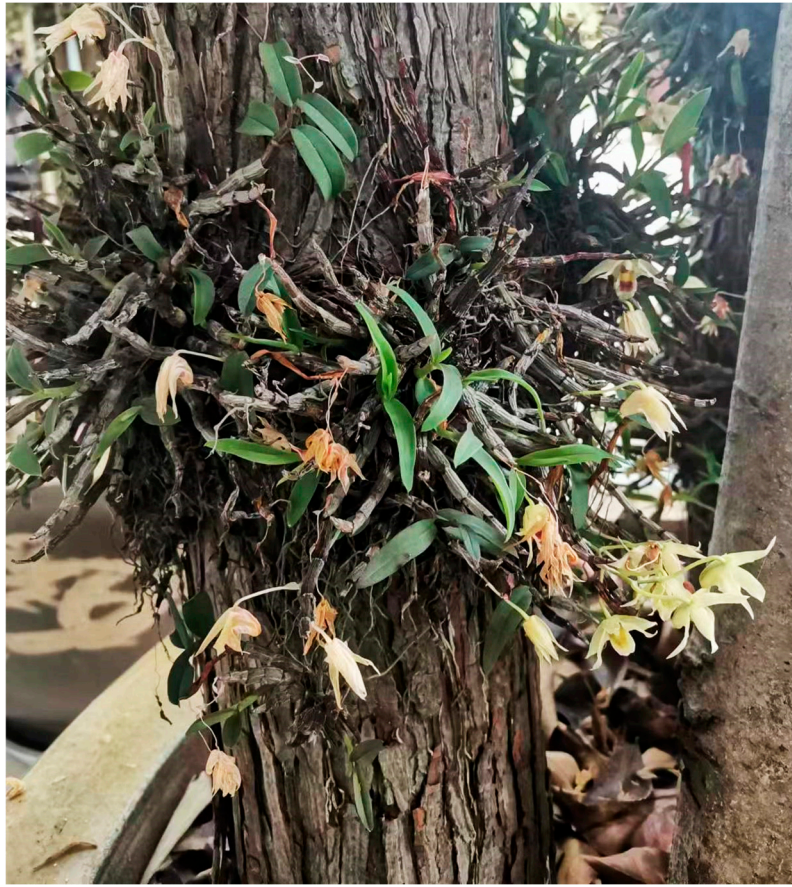

**Figure S1.** *Dendrobium catenatum* growing on the bark.

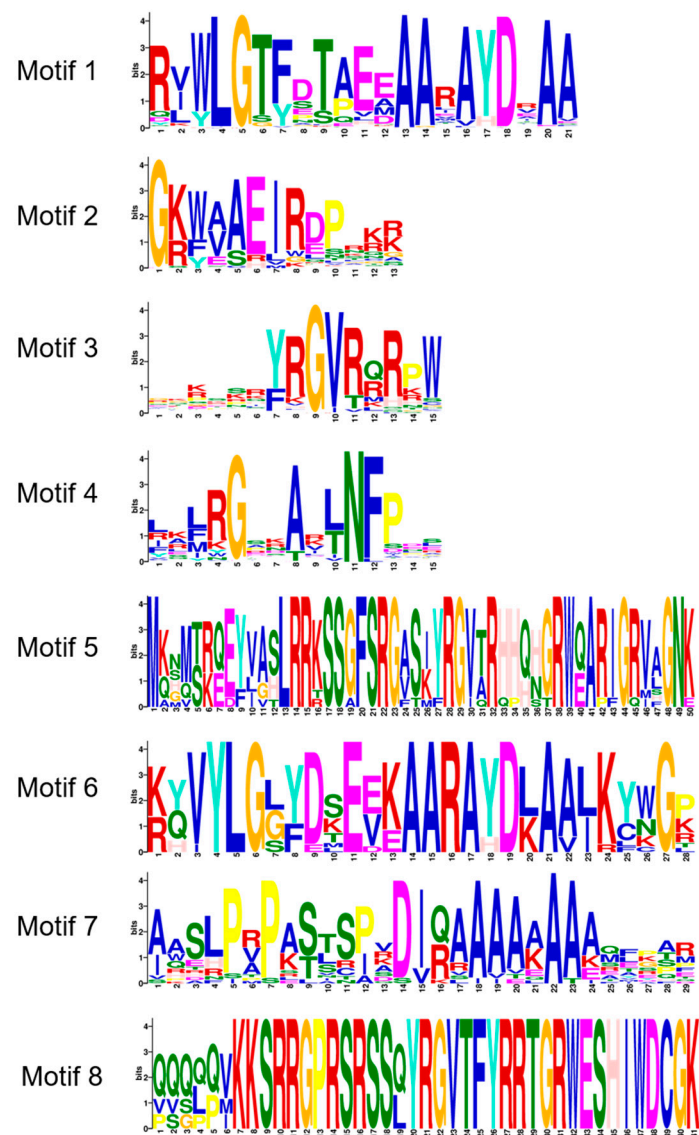

**Figure S2. Eight motif logos of DcAP2/ERF family proteins of *Dendrobium catenatum*.** The frequency of amino acids is represented by the height of letters.

**A**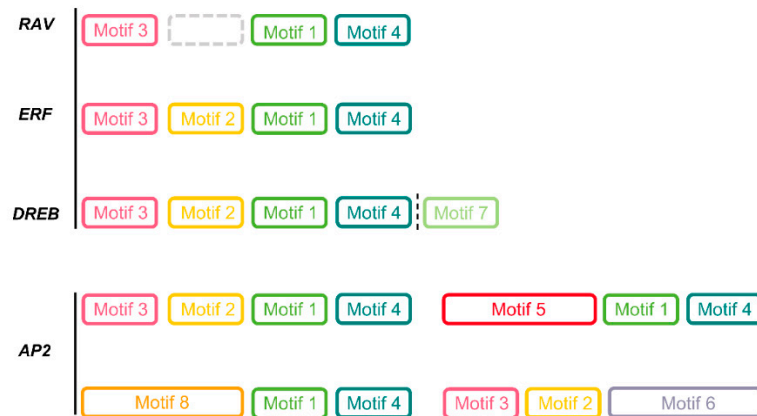**B**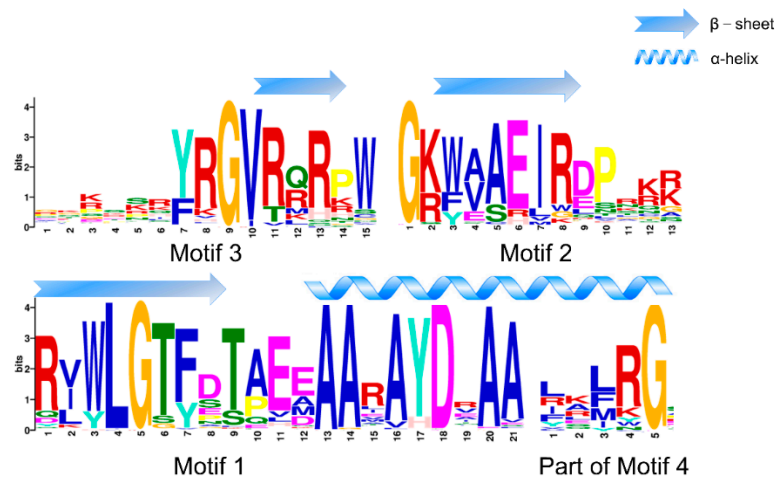

**Figure S3. *DcAP2/ERF* family domain analysis.** **A.** Basic motif composition of AP2 domains of each *DcAP2/ERF* subfamily protein. Different motifs are represented by different colors. **B.** Motif composition of typical AP2 domain of *DcAP2/ERF* family protein. The frequency of amino acid occurrences at each position is indicated by letter size.

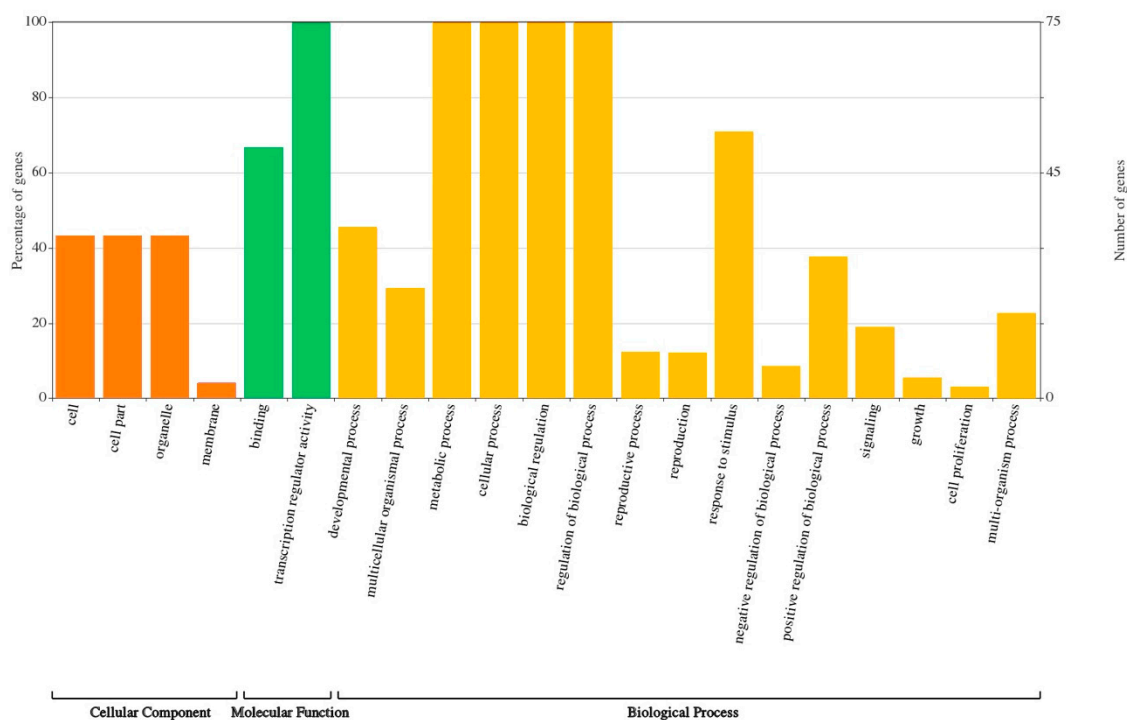

**Figure S4. Gene ontology (GO) annotation.** The GO terms were showed on the X axis, the percentage of genes and the number of genes were showed on the left and right Y axis respectively.

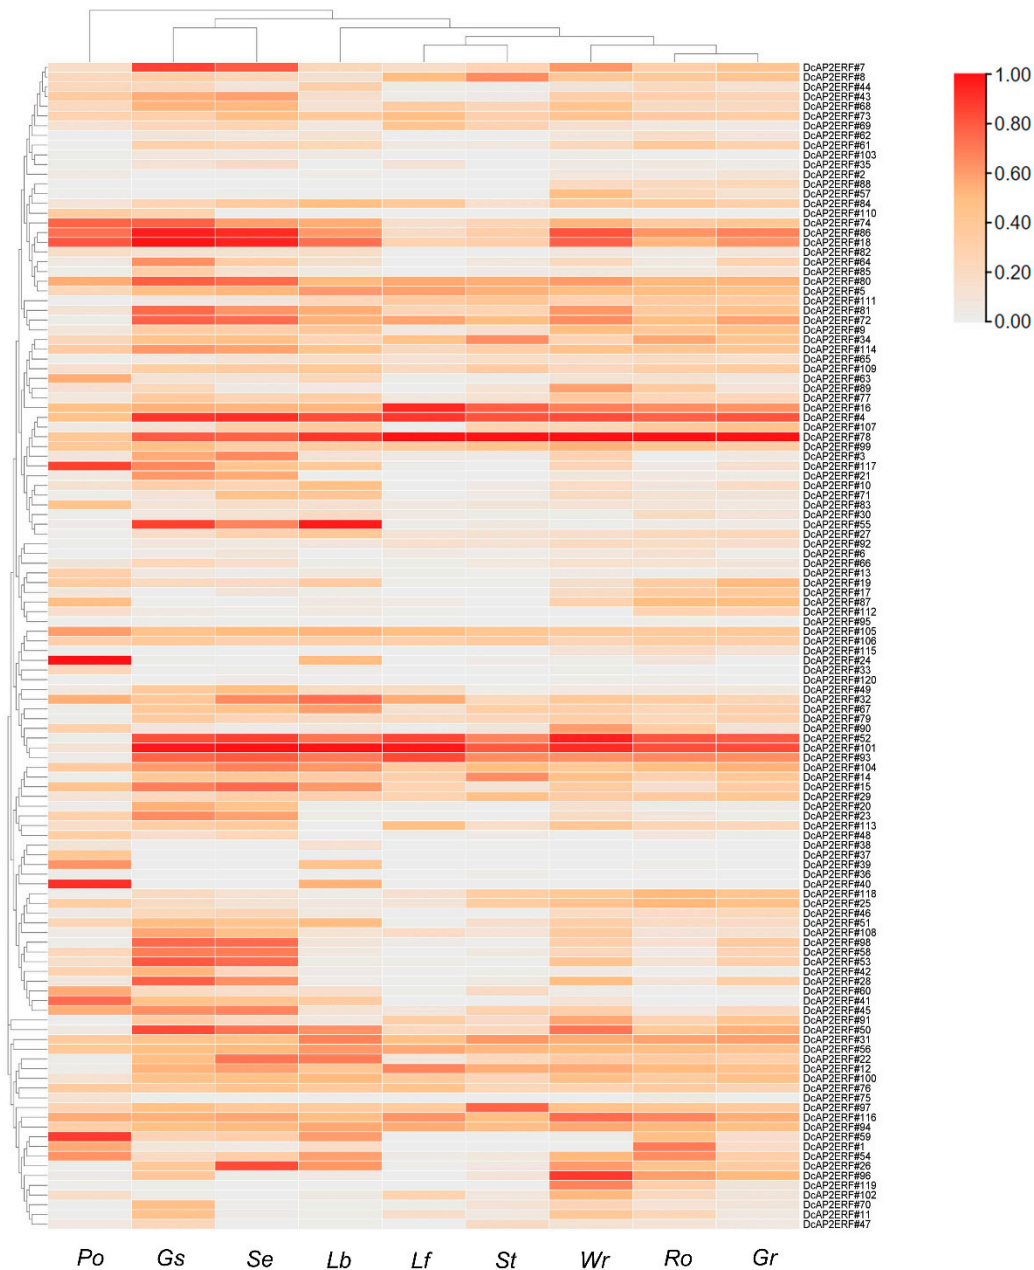

**Figure S5. Expression profiles of *DcAP2/ERF* genes in different tissues and organs.** The depth of red indicates the level of gene expression. Po: pollinia, Gs, gynostemium, Se: sepal, Lb: labellum, Lf: leaf, St: stem, Wr: white part of root, Ro: root, Gr: green root tip.

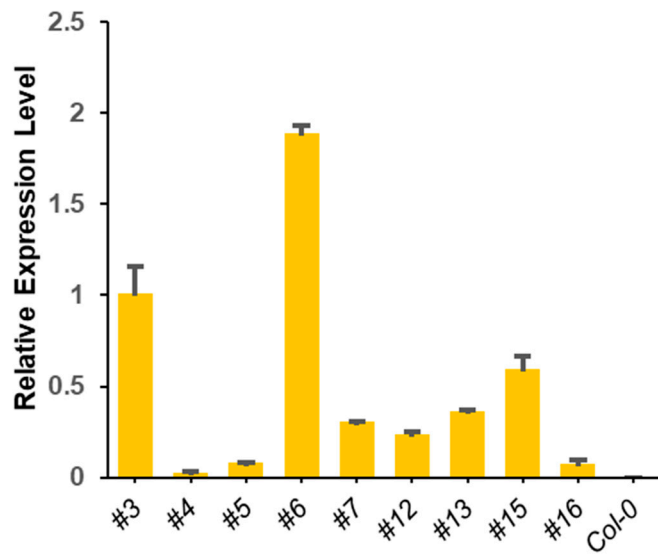

**Figure S6. Expression analysis of *DcAP2ERF#96-OE* transgenic lines.** *AtACTIN2* was used as an internal control. Values are presented as means  $\pm$  SD ( $n = 3$ ).

**Table S1. Primer sequences used for research.**

| Primer name     | Sequence (5' to 3')  |
|-----------------|----------------------|
| Dcactin-qF      | GAGGCACAATCAAAGCGTGG |
| Dcactin-qR      | CAAAGAGAGCACTGCCTGGA |
| DcAP2ERF#1-qF   | TCGTGCTTATGACCTGGCTG |
| DcAP2ERF#1-qR   | TGGACTGGCCTTGCATTTCT |
| DcAP2ERF#12-qF  | TTTCGACACCGAAGTGGAGG |
| DcAP2ERF#12-qR  | GTGCTCAGCTTGAACAGTCG |
| DcAP2ERF#16-qF  | GCGGTTTATCCGCCACTTTC |
| DcAP2ERF#16-qR  | CAGACATCGCCGTAGGACTC |
| DcAP2ERF#50-qF  | GCGGAGGACTCATGTGTTGA |
| DcAP2ERF#50-qR  | CAAGAAGCTCCACAGGGTGA |
| DcAP2ERF#52-qF  | AAAGGCAGGGGATACCGTTG |
| DcAP2ERF#52-qR  | GCCTCCATCGCTTCTAGACC |
| DcAP2ERF#54-qF  | ATTGAAGCTTTTCCGCGGTG |
| DcAP2ERF#54-qR  | CGTTCTGCCGAGATTAGGG  |
| DcAP2ERF#56-qF  | ATGGGAAGCTCGGATTGGTC |
| DcAP2ERF#56-qR  | ATGCCGCGGTATTTGATTGC |
| DcAP2ERF#78-qF  | GACTAGTCGCCGATCACTGG |
| DcAP2ERF#78-qR  | TTCACCAGAGGCGGAAGAAC |
| DcAP2ERF#86-qF  | AATTGGTCTGGAGTGAGGCG |
| DcAP2ERF#86-qR  | TCGCTACCAGTTGCCATCAG |
| DcAP2ERF#93-qF  | GAAGCTGTGTCCATTGTGCC |
| DcAP2ERF#93-qR  | AATGGTTTCGGTGATGGCCT |
| DcAP2ERF#96-qF  | GTTAGCGCCGGCAAAAGAAA |
| DcAP2ERF#96-qR  | GTCGTAGACCTTGGCAGCTT |
| DcAP2ERF#104-qF | ATATTGGGGCGCTGGAAGTC |
| DcAP2ERF#104-qR | CCCATCTGGTGCTTTGAGGT |
| AtADH1_qF       | ATGGTGGGGTGGACAGGA   |
| AtADH1_qR       | AACACCCCAGCCATCGTG   |
| AtABI5_qF       | AGAGGTGGTGGTAGCGGT   |
| AtABI5_qR       | CTAGCCGCAGTCTCACCG   |
| AtP5CS1_qF      | CGCCAAGTGGATAGCGCT   |
| AtP5CS1_qR      | CCCCACCTCTGCACCAAG   |
| AtABF4_qF       | GAAGGTAGCAGCGGAGGC   |
| AtABF4_qR       | AACCCCAGCACGGAACAG   |
| AtABI1_qF       | TCGGTGTTTACGACGGCC   |
| AtABI1_qR       | CTCCTCCGCCAAAGCCAA   |
| AtABF3_qF       | CCAAAGAGCGCCCTGGAT   |
| AtABF3_qR       | GCGGGATCTTGCAGCTGA   |
| AtRD22_qF       | GGACTTGGTTCGCGGGAA   |
| AtRD22_qR       | GGCACCGTTTCAGCCTCT   |
| AtRD29A_qF      | CGGAATCTGACGGCGGTT   |

|                       |                                           |
|-----------------------|-------------------------------------------|
| AtRD29A_qR            | CCGTCGGCACATCCTTGT                        |
| AtRAB18_qF            | CAGGTGGCCAAGGGTACG                        |
| AtRAB18_qR            | TGGAGTTGCTCTTGGCCG                        |
| Atactin2-qF           | CTCTCCTTGATCGCCAGTGGTC                    |
| Atactin2-qR           | TAAGGTCACGTCCAGCAAGGTC                    |
| DcAP2/ERF#96-GFP-F    | GGACTGCGGGTCTCACACCATGGATATGGAGTACTCCTCT  |
| DcAP2/ERF#96-GFP-R    | TTCTATCCCAAATATAGGACTTTG                  |
| DcAP2/ERF#96-pB42AD-F | TGCCTCTCCCGAATTCATGGATATGGAGTACTCCTCT     |
| DcAP2/ERF#96-pB42AD-R | CGAGTCGGCCGAATTCCTTCTATCCCAAATATAGGACTTTG |
| GCC-F                 | ATCTGTCTGACCTCGAGAGCCGCCAGCCGCCAGCCGCC    |
| GCC-R                 | GAGCACATGCCTCGAGGGCGGCTGGCGGCTGGCGGCT     |
| DRE-F                 | ATCTGTCTGACCTCGAGACCGACACCGACACCGAC       |
| DRE-R                 | GAGCACATGCCTCGAGGTTCGGTGTTCGGTGTTCGGT     |
| CRT-F                 | ATCTGTCTGACCTCGAGGCCGACGCCGACGCCGAC       |
| CRT-R                 | GAGCACATGCCTCGAGGTTCGGCGTTCGGCGTTCGGC     |
| DcAP2/ERF#96-BD-C-F   | CATGGAGGCCGAATTCATGGATATGGAGTACTCCTCT     |
| DcAP2/ERF#96-BD-C-R   | GCAGGTCGACGGATCCTCATGGAAGTCCGGTGGCCGA     |
| DcAP2/ERF#96-BD-M-F   | CATGGAGGCCGAATTCATGATTTACCGCGGCGTCAACC    |
| DcAP2/ERF#96-BD-M-R   | GCAGGTCGACGGATCCTCATTATGTTGTAGCGGCTCA     |
| DcAP2/ERF#96-BD-N-F   | CATGGAGGCCGAATTCATGAGCACCATAGCCAACCTGC    |
| DcAP2/ERF#96-BD-N-R   | GCAGGTCGACGGATCCTCATTCTATCCCAAATATAGG     |
| DcAP2/ERF#96-BD-F     | CATGGAGGCCGAATTCATGGATATGGAGTACTCCTCT     |
| DcAP2/ERF#96-BD-R     | GCAGGTCGACGGATCCTCATTCTATCCCAAATATAGG     |
| RAB18-lac-F           | ATCTGTCTGACCTCGAGACCCAGCCAAGTTTCTTCAA     |
| RAB18-lac-R           | GAGCACATGCCTCGAGGTTCTTCTTGTCTTAAGCAA      |
| P5CS1-lac-F           | ATCTGTCTGACCTCGAGGAAATCGTGAGAGACGACGT     |
| P5CS1-lac-R           | GAGCACATGCCTCGAGTATCGTCGTCGTCGTCTACC      |
| RD29A-lac-F           | ATCTGTCTGACCTCGAGGTTCTTGACATCATTCAATT     |
| RD29A-lac-R           | GAGCACATGCCTCGAGTCCAATAGAAGTAATCAAAC      |
| DREB2A-1-AD-F         | GGAGGCCAGTGAATTCATGGCGGAAGAAGAAAGGAA      |
| DREB2A-1-AD-R         | CGAGCTCGATGGATCCTGGTAAATCTGAAAAGAAGC      |
| DREB2A-2-AD-F         | GGAGGCCAGTGAATTCATGGCGGAGCCCGAAAGGAA      |
| DREB2A-2-AD-R         | CGAGCTCGATGGATCCGAAAAGGCCACCTCCATCAG      |

---



**Table S2. GO annotation of DcAP2/ERF gene family.**

| <b>Gene ID</b> | <b>GO ID</b> | <b>Gene ID</b> | <b>GO ID</b> |
|----------------|--------------|----------------|--------------|
| DcAP2ERF#98    | GO:0001101   | DcAP2ERF#41    | GO:0001067   |
| DcAP2ERF#96    | GO:0003002   | DcAP2ERF#40    | GO:0001067   |
| DcAP2ERF#95    | GO:0000302   | DcAP2ERF#4     | GO:0001666   |
| DcAP2ERF#93    | GO:0000160   | DcAP2ERF#39    | GO:0001067   |
| DcAP2ERF#91    | GO:0000003   | DcAP2ERF#38    | GO:0001067   |
| DcAP2ERF#90    | GO:0003674   | DcAP2ERF#37    | GO:0001067   |
| DcAP2ERF#89    | GO:0000003   | DcAP2ERF#36    | GO:0001067   |
| DcAP2ERF#88    | GO:0000003   | DcAP2ERF#35    | GO:0000160   |
| DcAP2ERF#87    | GO:0000302   | DcAP2ERF#33    | GO:0001067   |
| DcAP2ERF#85    | GO:0000160   | DcAP2ERF#32    | GO:0003674   |
| DcAP2ERF#80    | GO:0000160   | DcAP2ERF#30    | GO:0003674   |
| DcAP2ERF#8     | GO:0001067   | DcAP2ERF#29    | GO:0001101   |
| DcAP2ERF#78    | GO:0001666   | DcAP2ERF#28    | GO:0001067   |
| DcAP2ERF#77    | GO:0000003   | DcAP2ERF#27    | GO:0003674   |
| DcAP2ERF#73    | GO:0001067   | DcAP2ERF#26    | GO:0003674   |
| DcAP2ERF#70    | GO:0003674   | DcAP2ERF#25    | GO:0003674   |
| DcAP2ERF#7     | GO:0001067   | DcAP2ERF#24    | GO:0001067   |
| DcAP2ERF#69    | GO:0001067   | DcAP2ERF#22    | GO:0000003   |
| DcAP2ERF#68    | GO:0001067   | DcAP2ERF#21    | GO:0003674   |
| DcAP2ERF#66    | GO:0000160   | DcAP2ERF#20    | GO:0001101   |
| DcAP2ERF#64    | GO:0000160   | DcAP2ERF#17    | GO:0000302   |
| DcAP2ERF#63    | GO:0000003   | DcAP2ERF#16    | GO:0003674   |
| DcAP2ERF#62    | GO:0000160   | DcAP2ERF#15    | GO:0001101   |
| DcAP2ERF#61    | GO:0000160   | DcAP2ERF#14    | GO:0001101   |
| DcAP2ERF#60    | GO:0001067   | DcAP2ERF#120   | GO:0000003   |
| DcAP2ERF#59    | GO:0000981   | DcAP2ERF#12    | GO:0000003   |
| DcAP2ERF#58    | GO:0001101   | DcAP2ERF#118   | GO:0003674   |
| DcAP2ERF#52    | GO:0000160   | DcAP2ERF#115   | GO:0001067   |
| DcAP2ERF#50    | GO:0000003   | DcAP2ERF#112   | GO:0000302   |
| DcAP2ERF#5     | GO:0000160   | DcAP2ERF#111   | GO:0003674   |
| DcAP2ERF#49    | GO:0003674   | DcAP2ERF#11    | GO:0003674   |
| DcAP2ERF#47    | GO:0003674   | DcAP2ERF#107   | GO:0001666   |
| DcAP2ERF#46    | GO:0003674   | DcAP2ERF#106   | GO:0001067   |
| DcAP2ERF#45    | GO:0001067   | DcAP2ERF#105   | GO:0001067   |
| DcAP2ERF#44    | GO:0001067   | DcAP2ERF#104   | GO:0001101   |
| DcAP2ERF#43    | GO:0001067   | DcAP2ERF#103   | GO:0000160   |
| DcAP2ERF#42    | GO:0003674   | DcAP2ERF#101   | GO:0000160   |
| DcAP2ERF#1     | GO:0000981   |                |              |

**Table S3. DcAP2/ERF Family Promoter Details.**

(In separate Excel table “Table S3”)

**Table S4. Differential expression analysis of *DcAP2/ERF* family under low temperature treatment.**

(In separate Excel table “Table S4”)

**Table S5. Differential expression analysis of *DcAP2/ERF* family under MeJA treatment.**

(In separate Excel table “Table S5”)
